# Supplementary material for: ROCK1 is a potential combinatorial drug target for BRAF mutant melanoma
Source: PubMed Central journal article supplement (PMC4300494; doi:10.15252/msb.20145450), 2014-12-23
Supplement: msb0010-0772-sd1.pdf [file msb0010-0772-sd1.pdf]

Figure S1

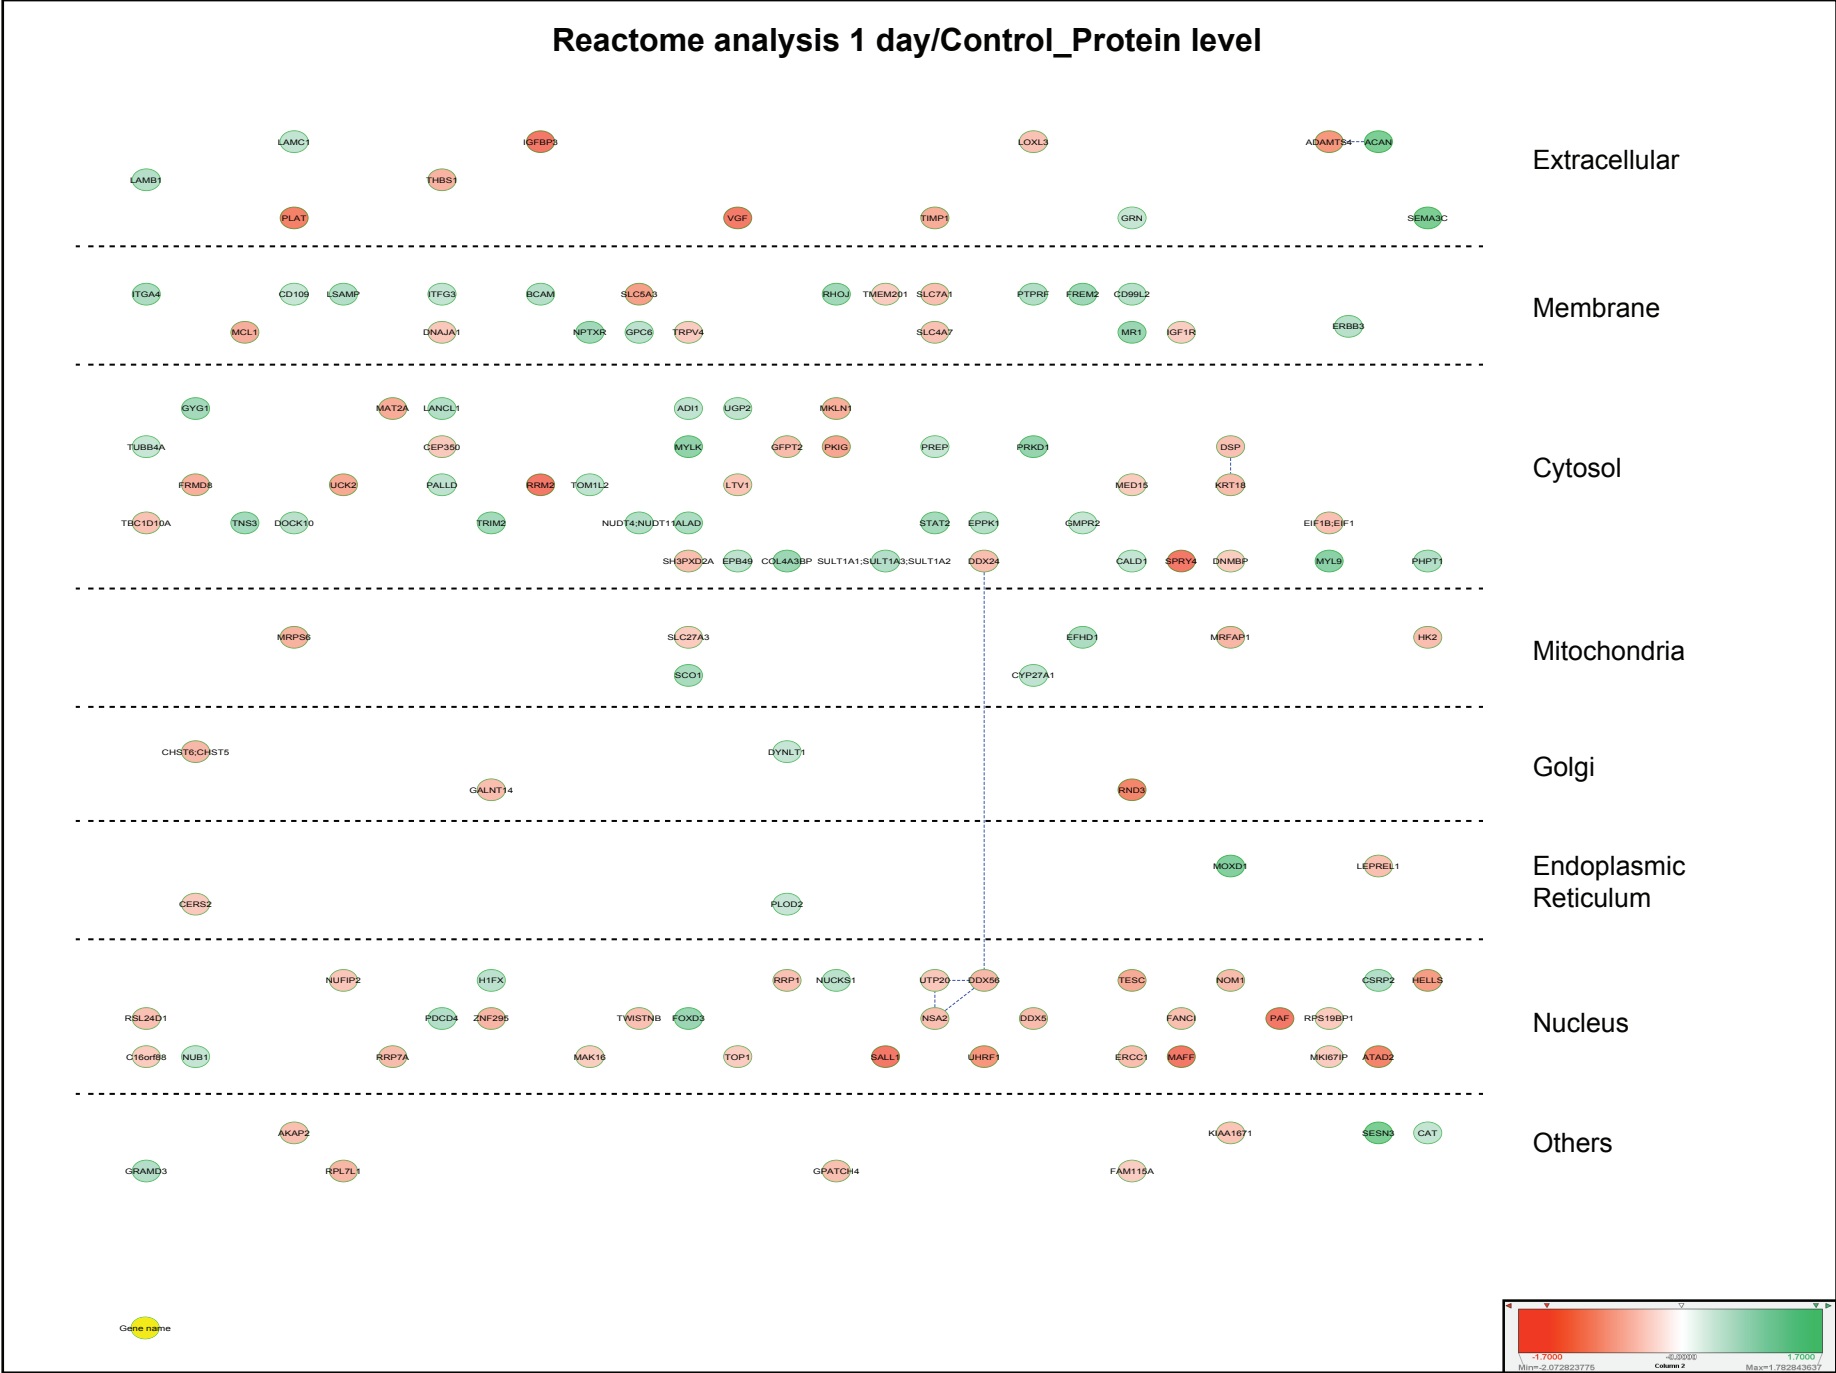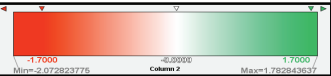

# Reactome analysis 3 days/Control\_Protein level

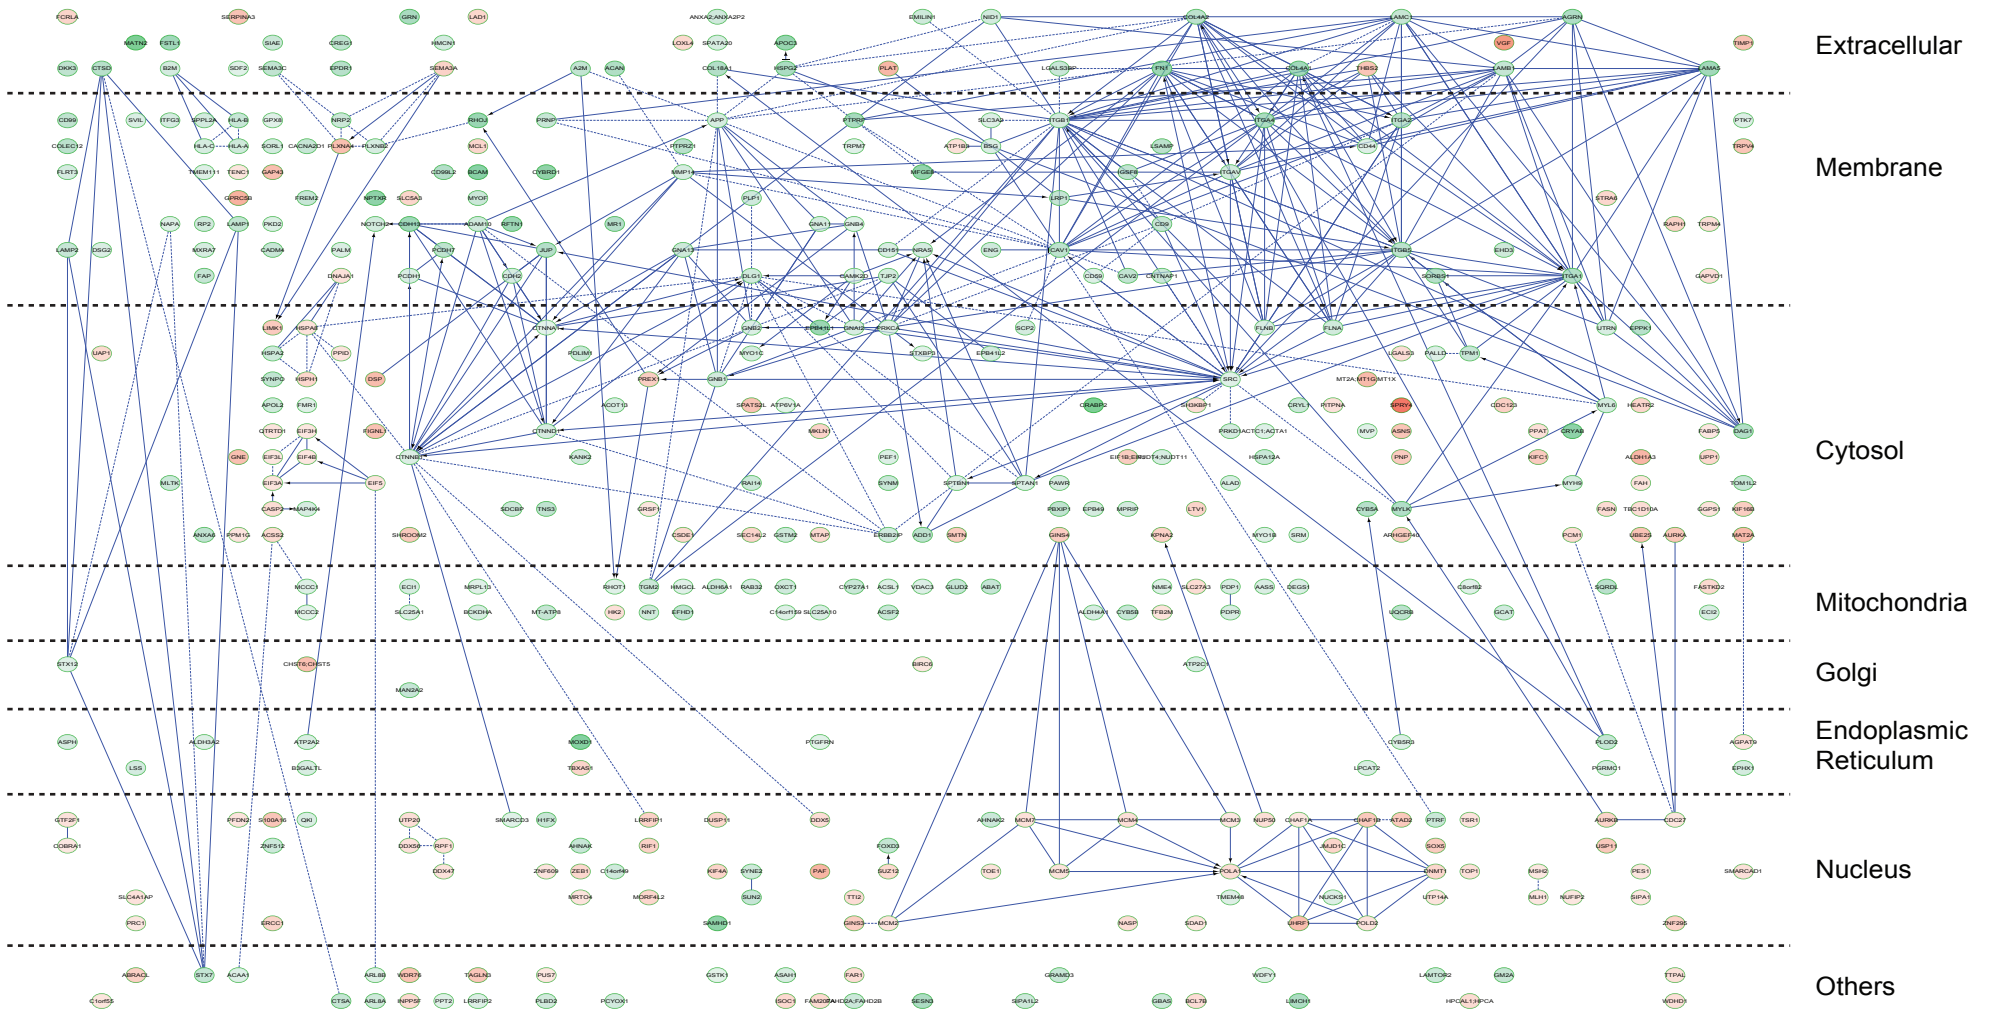

Extracellular

Membrane

Cytosol

Mitochondria

Golgi

Endoplasmic Reticulum

Nucleus

Others

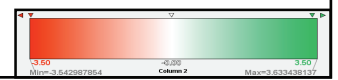

# Reactome analysis 3 days/1 day\_Protein level

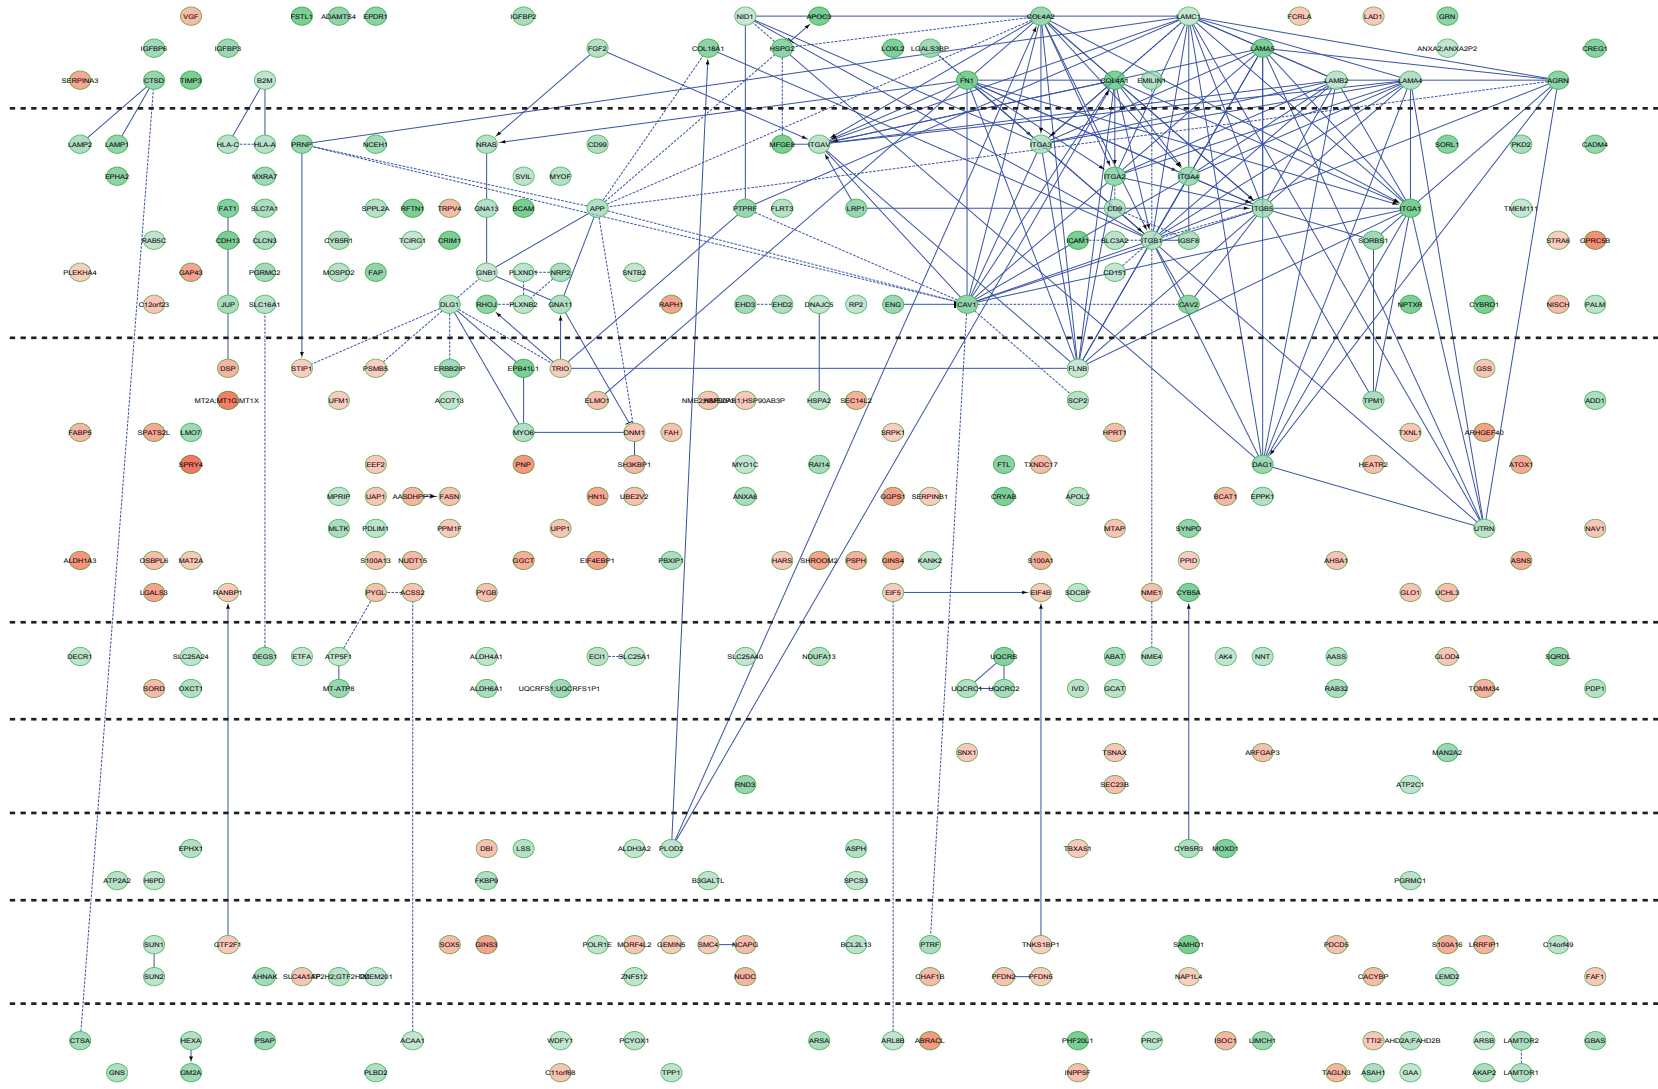

Extracellular

Membrane

Cytosol

Mitochondria

Golgi

Endoplasmic Reticulum

Nucleus

Others

Color coding

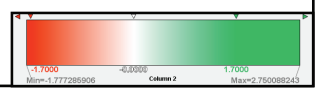

**Figure S1. Reactome analysis at protein level at 1d/control; 3d/control; and 3d/1d.** The  $\log_2$  protein ratio is represented by the color scale where the up-regulated proteins are highlighted in green, while the down-regulated are labeled in red.
