# Supplementary material for: ROCK1 is a potential combinatorial drug target for BRAF mutant melanoma
Source: PubMed Central journal article supplement (PMC4300494; doi:10.15252/msb.20145450), 2014-12-23
Supplement: msb0010-0772-sd3.pdf [file msb0010-0772-sd3.pdf]

Figure S3

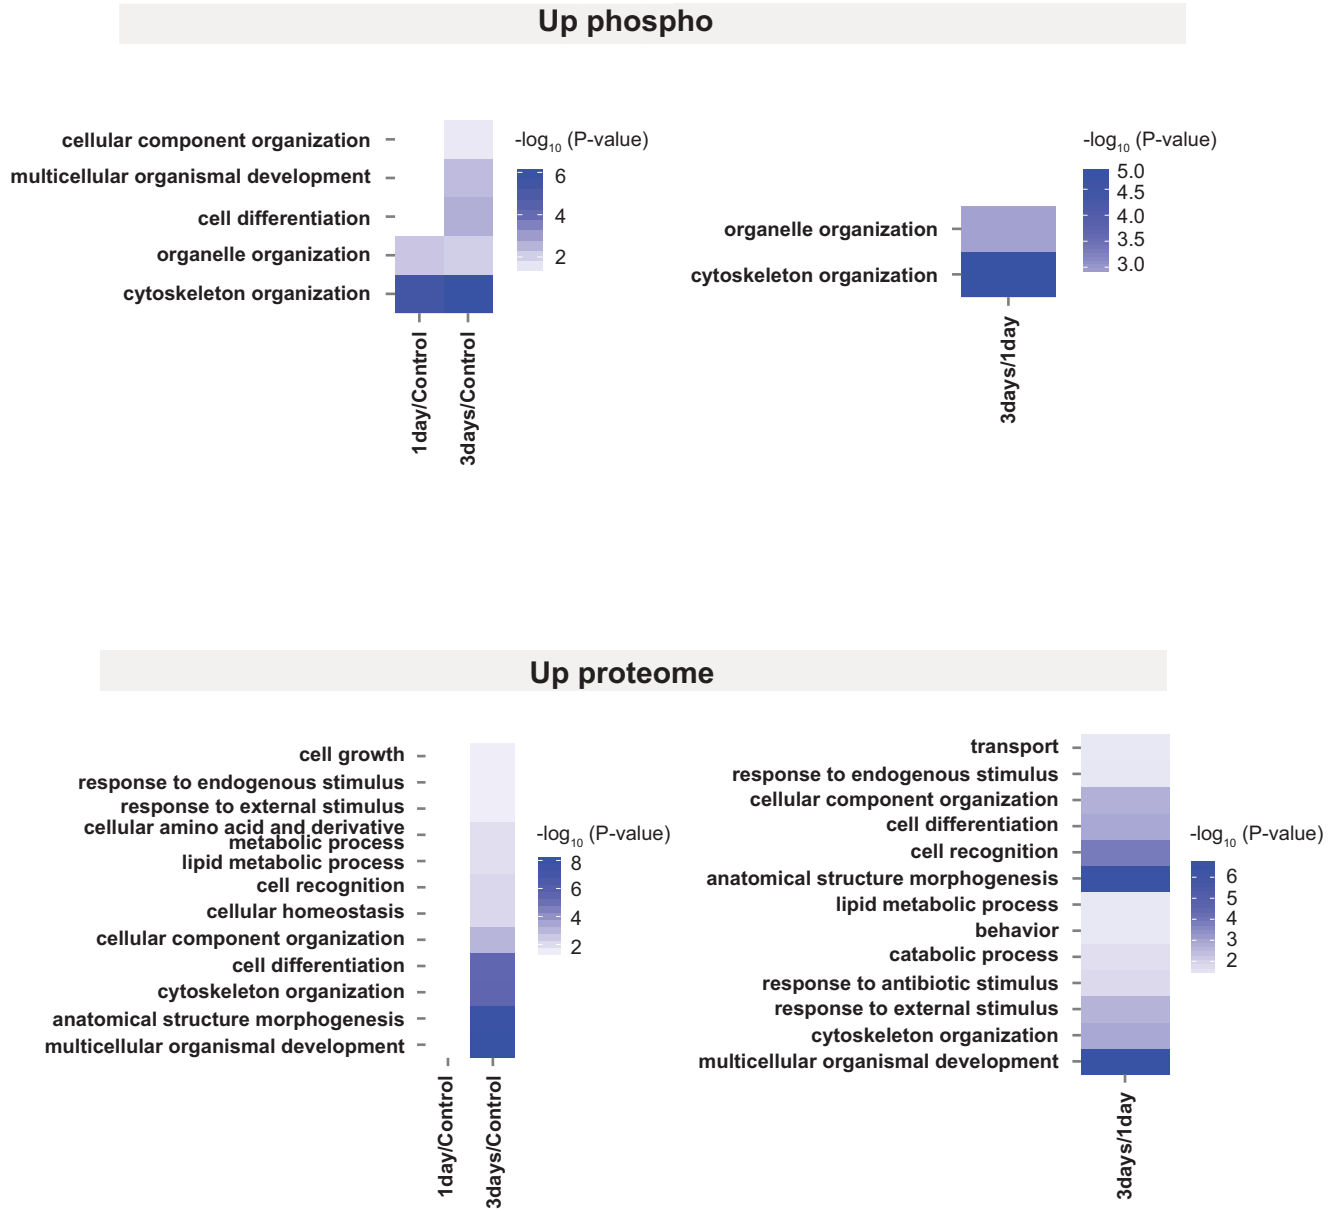

## Down phospho

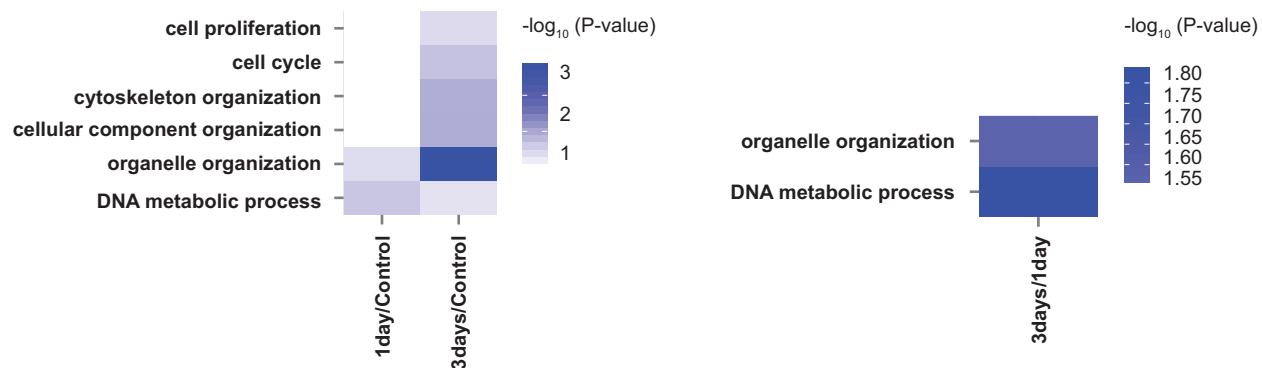

## Down proteome

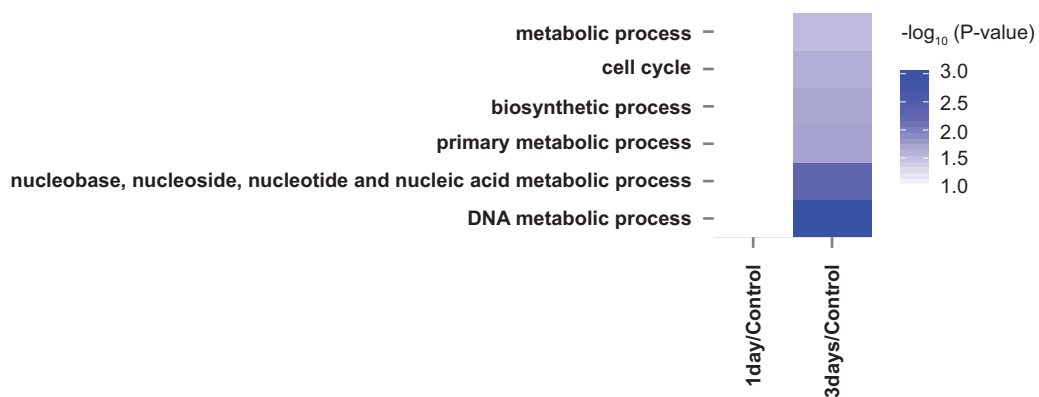

Figure S3. GO slim enrichment analysis. GO slim enrichment analysis using BiNGO as cytoscape plugin.
